# Supplementary material
Source: PubMed Central journal article supplement (PMC5878159)
Supplement: 12663_2016_965_MOESM1_ESM.pdf [file 12663_2016_965_MOESM1_ESM.pdf]

Online resource 1.

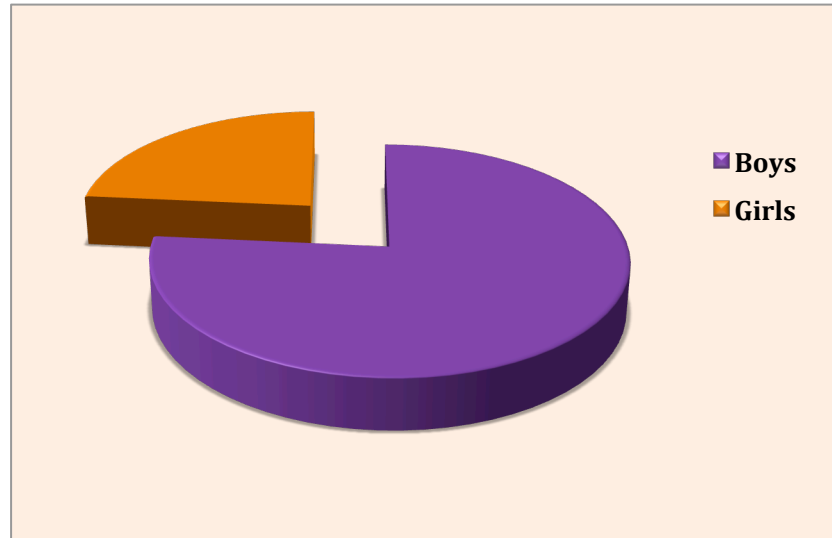

Gender distribution of pediatric facial fractures

Online resource 2.

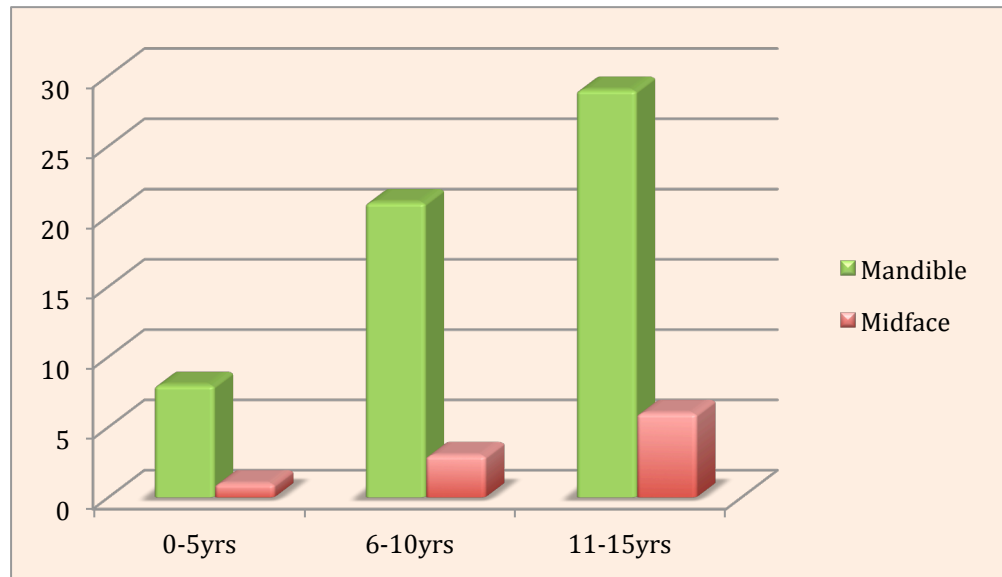

Distribution of pediatric facial fractures according to age

Online resource 3.

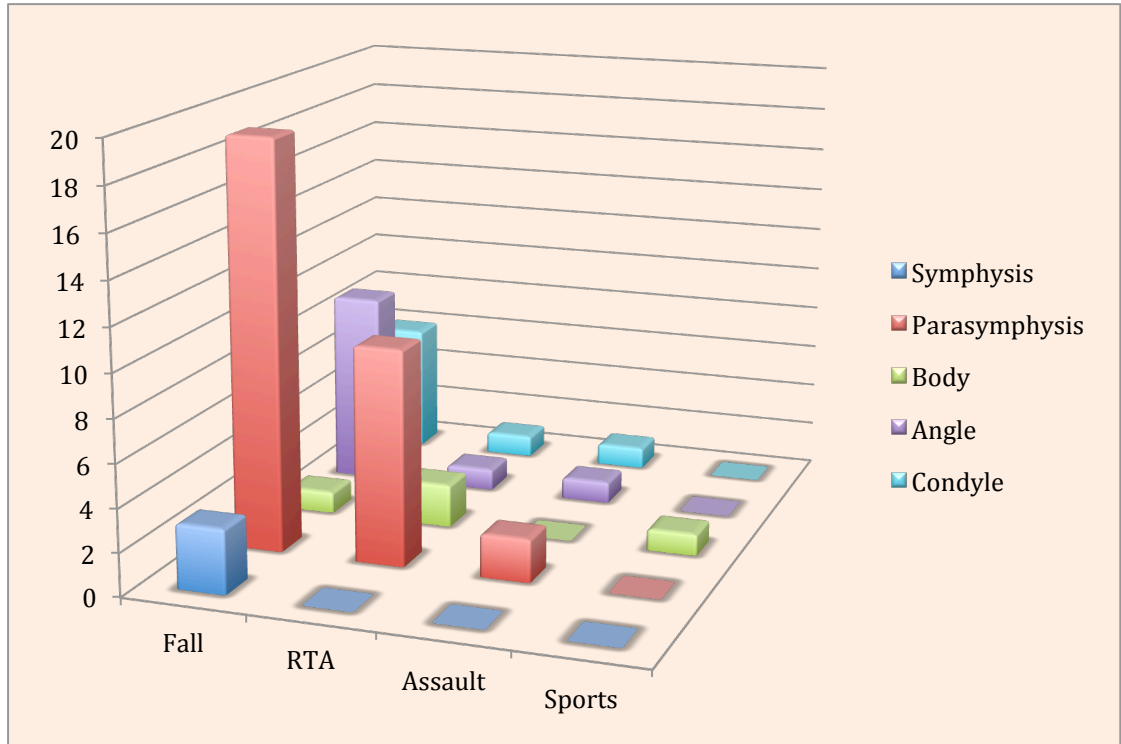

Distribution of pediatric mandibular fractures according to etiology

Online resource 4.

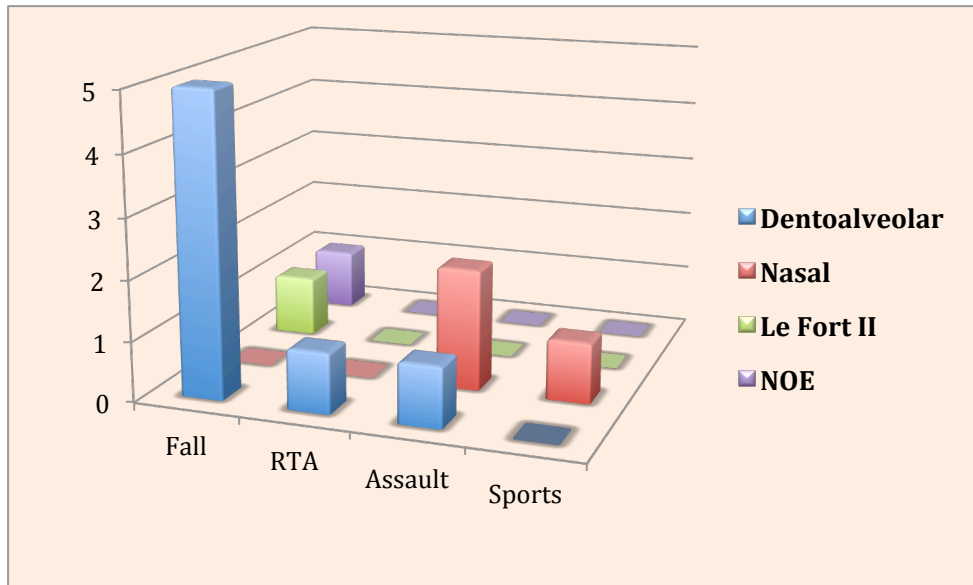

Distribution of pediatric midface fracture according to etiology

## Captions

- ◆ Online resource 1 - Gender distribution of pediatric facial fractures
- ◆ Online resource 2 – Distribution of pediatric facial fractures according to age
- ◆ Online resource 3 - Distribution of pediatric mandibular fractures according to etiology
- ◆ Online resource 4 - Distribution of pediatric midface fracture according to etiology
